# Supplementary material
Source: MDPI journal article supplement (https://www.mdpi.com/2313-0105/10/1/11)
Supplement: s1 [file s1]

# All-solid-state Li-metal cell using nanocomposite TiO<sub>2</sub> /polymer electrolyte and self-standing LiFePO<sub>4</sub> cathode

Asia Patriarchi<sup>1</sup>, Hamideh Darjazi<sup>2,3</sup>, Luca Minnetti<sup>1</sup>, Leonardo Sbrascini<sup>1</sup>, Giuseppe Antonio Elia <sup>2,3</sup>, Vincenzo Castorani<sup>4</sup>, Miguel Ángel Muñoz-Márquez<sup>1,3</sup>, Francesco Nobili<sup>1,3,\*</sup>

<sup>1</sup> *Chemistry Division , School of Science and Technology, University of Camerino, Via Madonna delle Carceri-ChIP, 62032 Camerino, MC, Italy; asia.patriarchi@unicam.it (A.P.); luca.minnetti@unicam.it (L.M.); leonardo.sbrascini@unicam.it (L.S.); miguel.munoz@unicam.it (M.Á.M.-M.)*

<sup>2</sup> *GAME Lab, Department of Applied Science and Technology (DISAT), Politecnico di Torino, Corso Duca degli Abruzzi 24, 10129 Torino, TO, Italy; hamideh.darjazi@polito.it (H.D.); giuseppe.elia@polito.it (G.A.E.)*

<sup>3</sup> *National Reference Center for Electrochemical Energy Storage (GISEL)—INSTM, Via Giusti 9, 50121 Firenze, FI, Italy*

<sup>4</sup> *HP Composites S.p.A., Via del Lampo, sn, Zona Ind.le Campolungo, 63100 Ascoli Piceno, AP, Italy; v.castorani@hpcomposites.it*

*\* Correspondence: francesco.nobili@unicam.it; Tel.: +39-0737-402216*

## Supporting Information

**Table S1:** Electrolyte resistance ( $R_e$ ), interphase resistance ( $R_i$ ), and chi-square value indicating the accuracy ( $\chi^2$ ) of the non-linear least squares (NLLS) analysis using the equivalent circuit  $R_e(R_1C_1)(R_2C_2)Q_w$  on the EIS data of the symmetrical Li/membrane/Li cells with different polymer-to-salt ratio (EO/Li), collected at OCV of the cells and after 25 hours. See Figure 1b,d in the manuscript for related Nyquist plots.

|            | Cell Condition | $R_e$ ( $\Omega$ ) | $R_i = R_1 + R_2$ ( $\Omega$ ) | $R = R_e + R_i$ ( $\Omega$ ) | $\chi^2$           |
|------------|----------------|--------------------|--------------------------------|------------------------------|--------------------|
| EO/Li 18:1 | OCV            | $18.7 \pm 0.2$     | $190 \pm 11$                   | $209 \pm 11$                 | $2 \times 10^{-5}$ |
|            | After 25 hours | $3.6 \pm 0.6$      | $448 \pm 6$                    | $452 \pm 6$                  | $1 \times 10^{-5}$ |
| EO/Li 21:1 | OCV            | $11.0 \pm 0.4$     | $125 \pm 6$                    | $136 \pm 6$                  | $4 \times 10^{-5}$ |
|            | After 25 hours | $13.3 \pm 0.3$     | $178 \pm 11$                   | $191 \pm 11$                 | $3 \times 10^{-5}$ |
| EO/Li 25:1 | OCV            | $10 \pm 2$         | $776 \pm 13$                   | $786 \pm 13$                 | $2 \times 10^{-5}$ |
|            | After 25 hours | $24.3 \pm 0.3$     | $929 \pm 8$                    | $953 \pm 8$                  | $1 \times 10^{-5}$ |

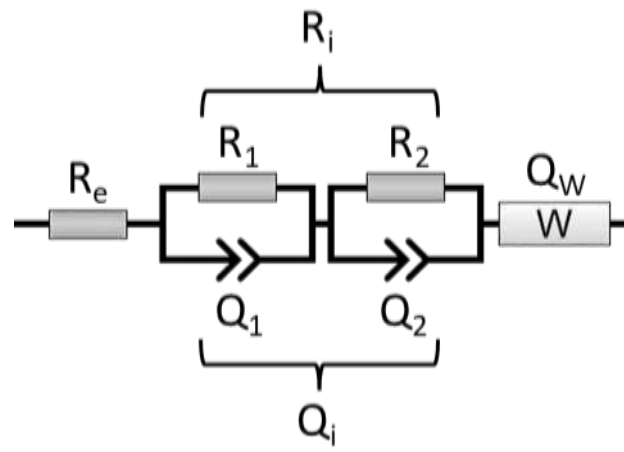

*Figure S1: Representation of the equivalent circuit used in Figure 1b,d.*

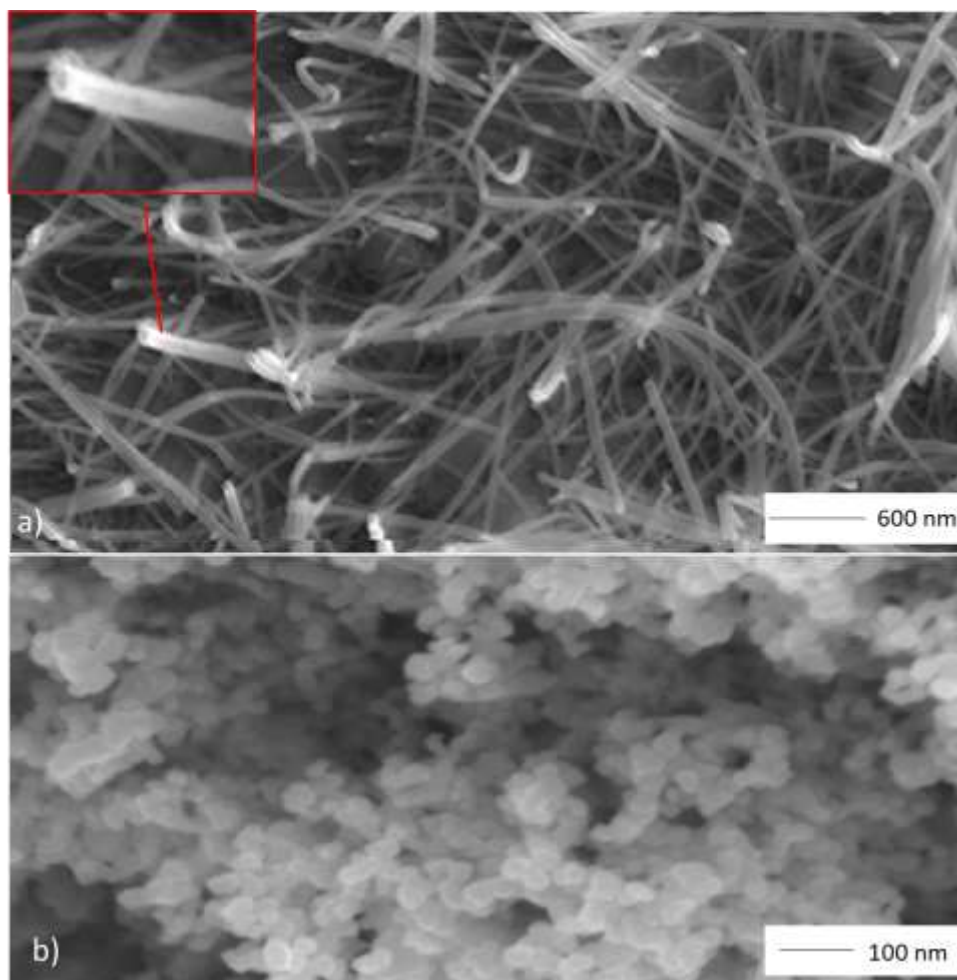

*Figure S2: SEM images of (a) synthesized titanium dioxide nanotubes and (b) commercial P25 nanoparticles.*

**Table S2:** Electrolyte resistance ( $R_e$ ), interphase resistance ( $R_i$ ), and chi-square value indicating the accuracy ( $\chi^2$ ) of the non-linear least squares (NLLS) analysis using the equivalent circuit  $R_e(R_1C_1)(R_2C_2)Q_w$  on the EIS data of the symmetrical Li/membrane/Li cells with  $\text{TiO}_2$  filler with different morphologies (nanotubes or nanoparticles) and concentration, collected at OCV of the cells and after 25 hours. See Figure 3 in the manuscript for related Nyquist plots.

|               | Filler Concentration | Cell Condition | $R_e (\Omega)$ | $R_i = R_1 + R_2 (\Omega)$ | $\chi^2$           |
|---------------|----------------------|----------------|----------------|----------------------------|--------------------|
| Nanoparticles | NP15                 | OCV            | $17.0 \pm 0.3$ | $193 \pm 14$               | $2 \times 10^{-5}$ |
|               |                      | After 25 hours | $13.2 \pm 0.2$ | $445 \pm 34$               | $1 \times 10^{-5}$ |
|               | NP10                 | OCV            | $22.8 \pm 0.9$ | $78 \pm 8$                 | $2 \times 10^{-5}$ |
|               |                      | After 25 hours | $18.3 \pm 0.3$ | $209 \pm 18$               | $2 \times 10^{-5}$ |
|               | NP3                  | OCV            | $22.8 \pm 0.2$ | $380 \pm 10$               | $7 \times 10^{-6}$ |
|               |                      | After 25 hours | $16.6 \pm 0.2$ | $437 \pm 9$                | $8 \times 10^{-6}$ |
| Nanotubes     | NT15                 | OCV            | $41.8 \pm 0.2$ | $103 \pm 4$                | $1 \times 10^{-5}$ |
|               |                      | After 25 hours | $25.9 \pm 0.9$ | $155 \pm 11$               | $5 \times 10^{-5}$ |
|               | NT10                 | OCV            | $21.1 \pm 0.3$ | $73 \pm 4$                 | $1 \times 10^{-5}$ |
|               |                      | After 25 hours | $16.4 \pm 0.3$ | $91 \pm 5$                 | $2 \times 10^{-5}$ |
|               | NT3                  | OCV            | $34.5 \pm 0.6$ | $254 \pm 8$                | $7 \times 10^{-6}$ |
|               |                      | After 25 hours | $21.6 \pm 0.5$ | $400 \pm 10$               | $1 \times 10^{-5}$ |

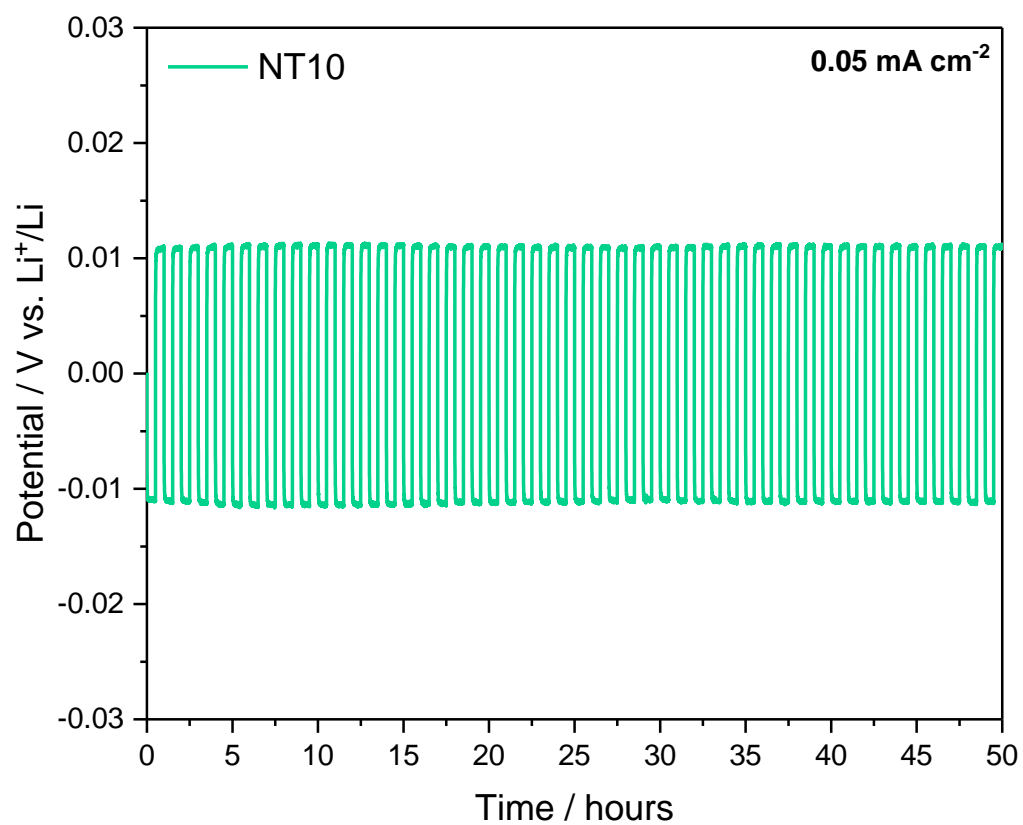

**Figure S3:** 50 hours of galvanostatic plating/stripping test performed on symmetrical Li/NT10/Li cells.  $I = 0.05 \text{ mA cm}^{-2}$ ;  $T = 65 \text{ }^{\circ}\text{C}$ .

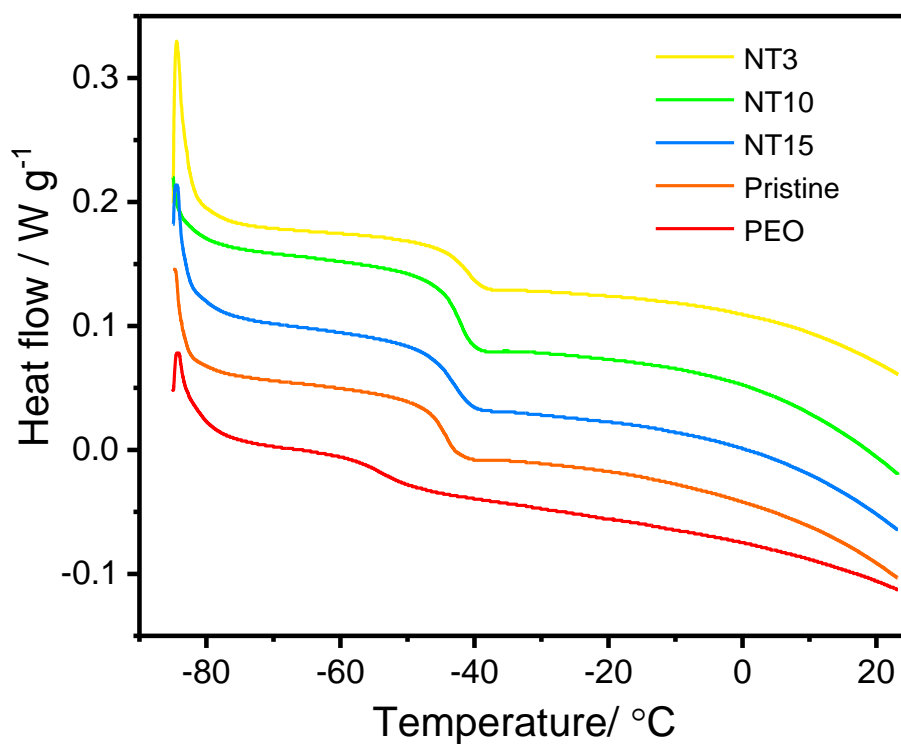

**Figure S4:** Differential Scanning Calorimetry curves of PEO polymer (red), pristine membrane (orange), NT15 (blue), NT10 (green), and NT3 (yellow) recorded under nitrogen flow in the -80 – 25 °C temperature range.

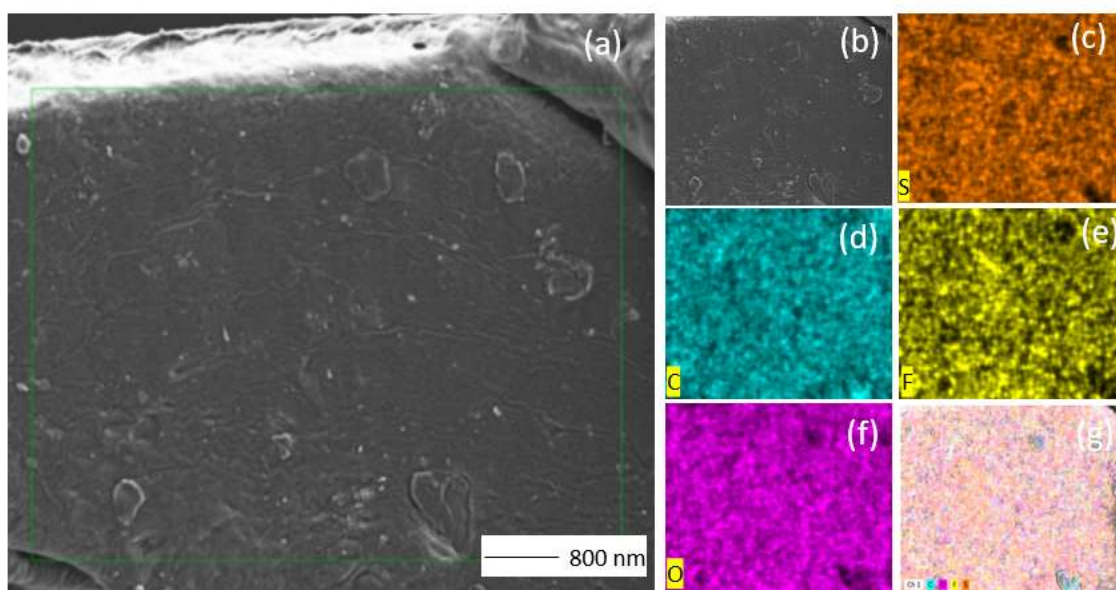

**Figure S5:** (a) SEM image of the pristine membrane, (b) EDS mapping of (c) sulfur (d) carbon (e) fluorine and (f) oxygen. (g) Overlapping of all the elements detected by EDS.



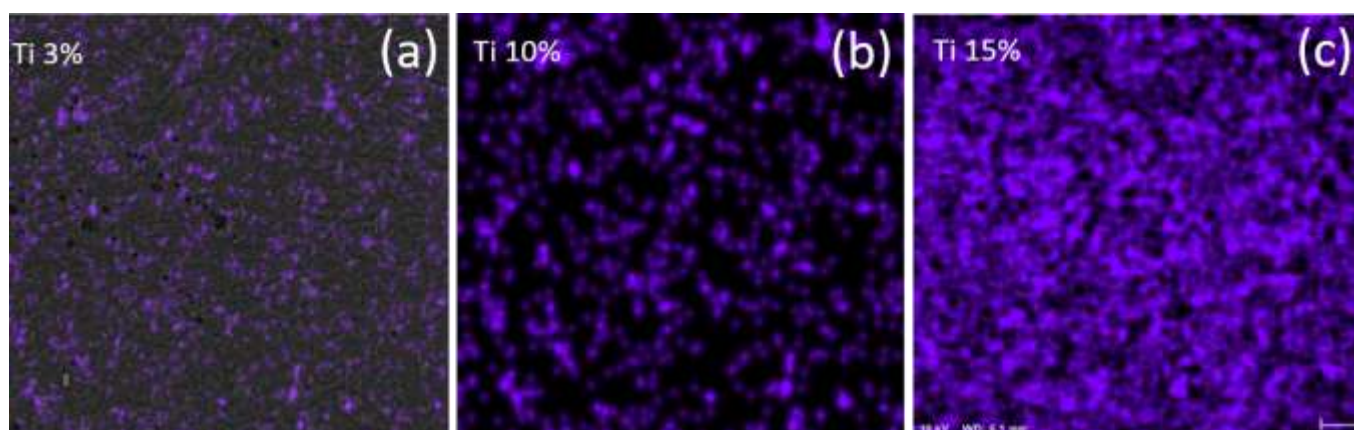

**Figure S6:** EDS elemental maps of different concentrations of  $\text{TiO}_2$  in (a) NT3, (b) NT10, and (c) NT15.

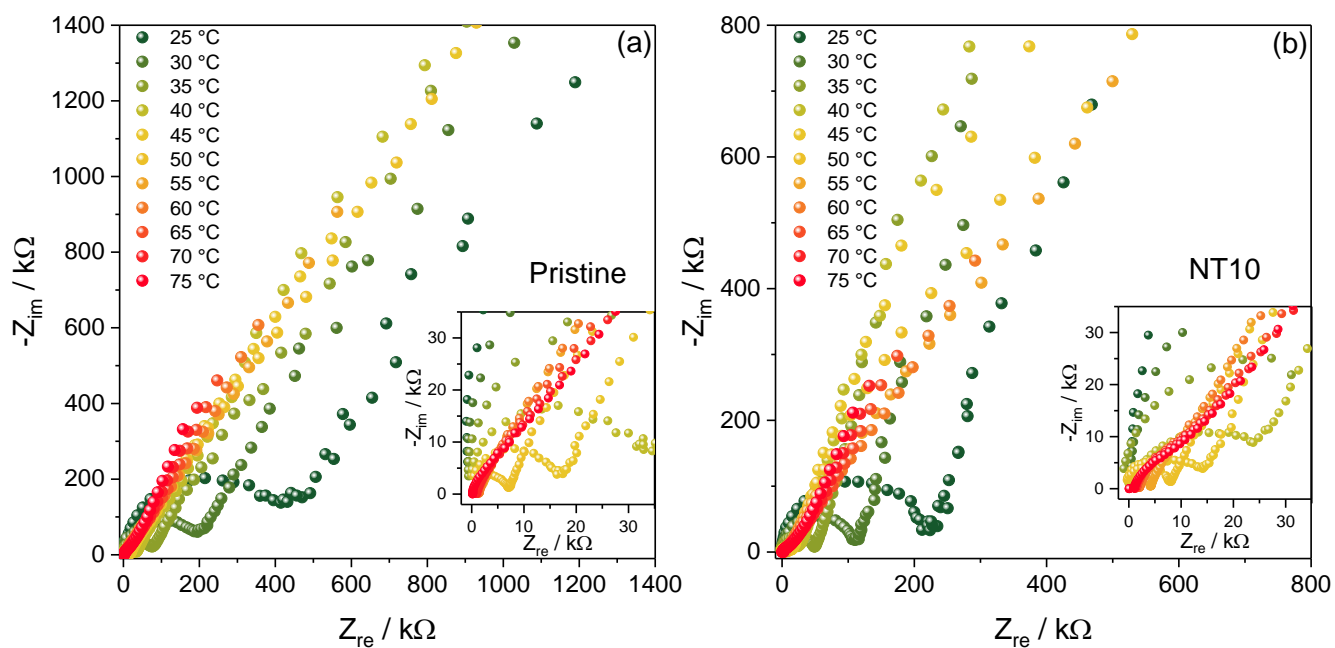

**Figure S7:** Nyquist plots related to EIS measurements performed at various temperatures on a stainless-steel/membrane/stainless-steel symmetrical cell with (a) pristine membrane and (b) NT10 to evaluate the electrolyte ionic conductivity, with magnification of the high-frequency region in the insets.

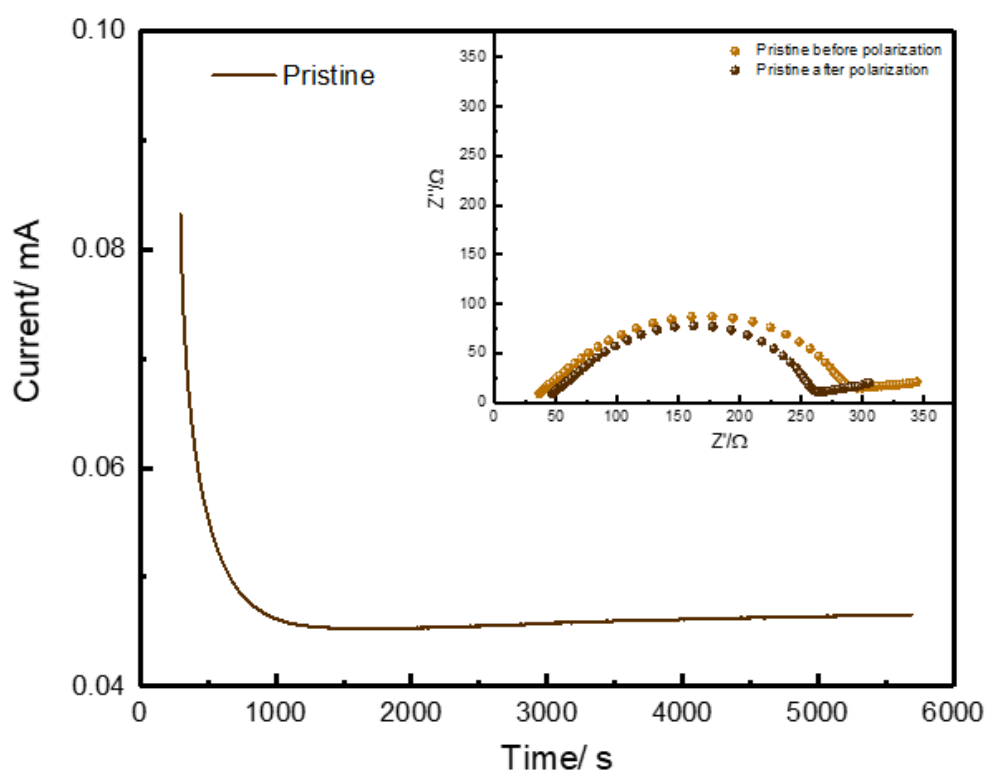

**Figure S8:** Chronoamperometry curve recorded on a Li/Li symmetrical cell using pristine membrane as electrolyte for determination of  $\text{Li}^+$  transference number at 65 °C. The inset displays the corresponding Nyquist plots obtained by EIS at the initial and steady state.

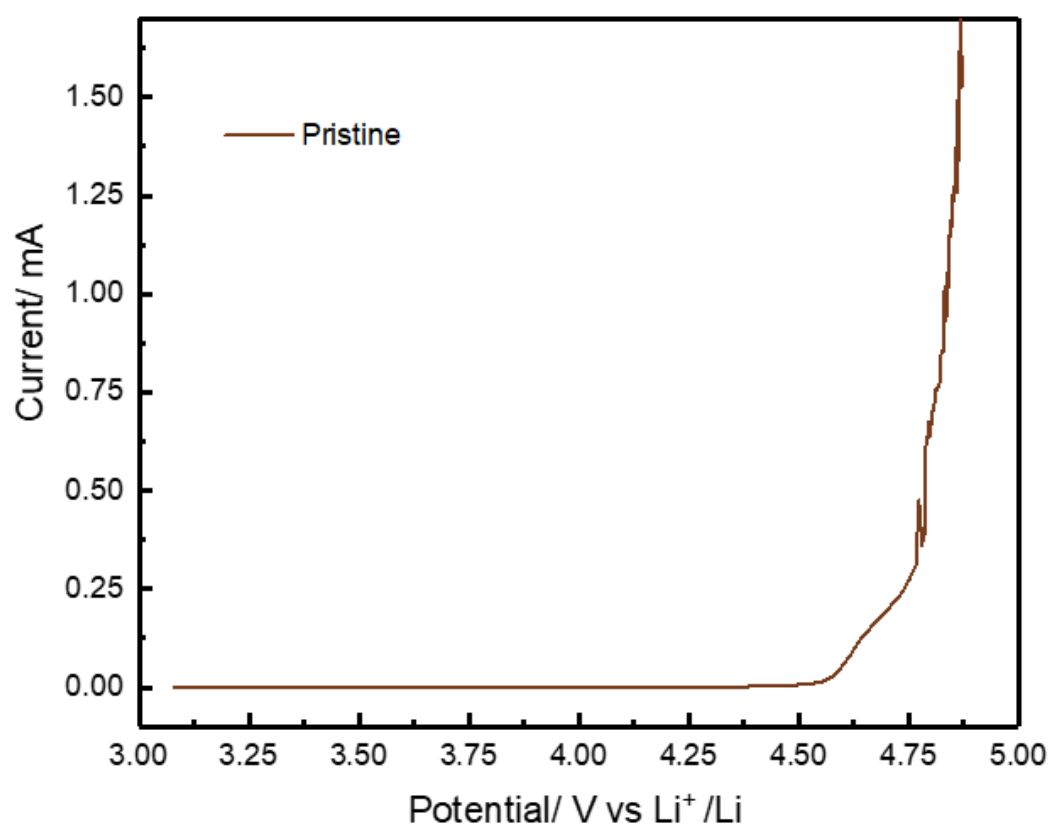

**Figure S9:** Linear sweep voltammetry in anodic region (OCV – 5 V vs. Li<sup>+</sup>/Li potential range) performed at 65 °C in lithium cell using the pristine membrane as the electrolyte and Super P carbon coated on aluminium as the working electrode.

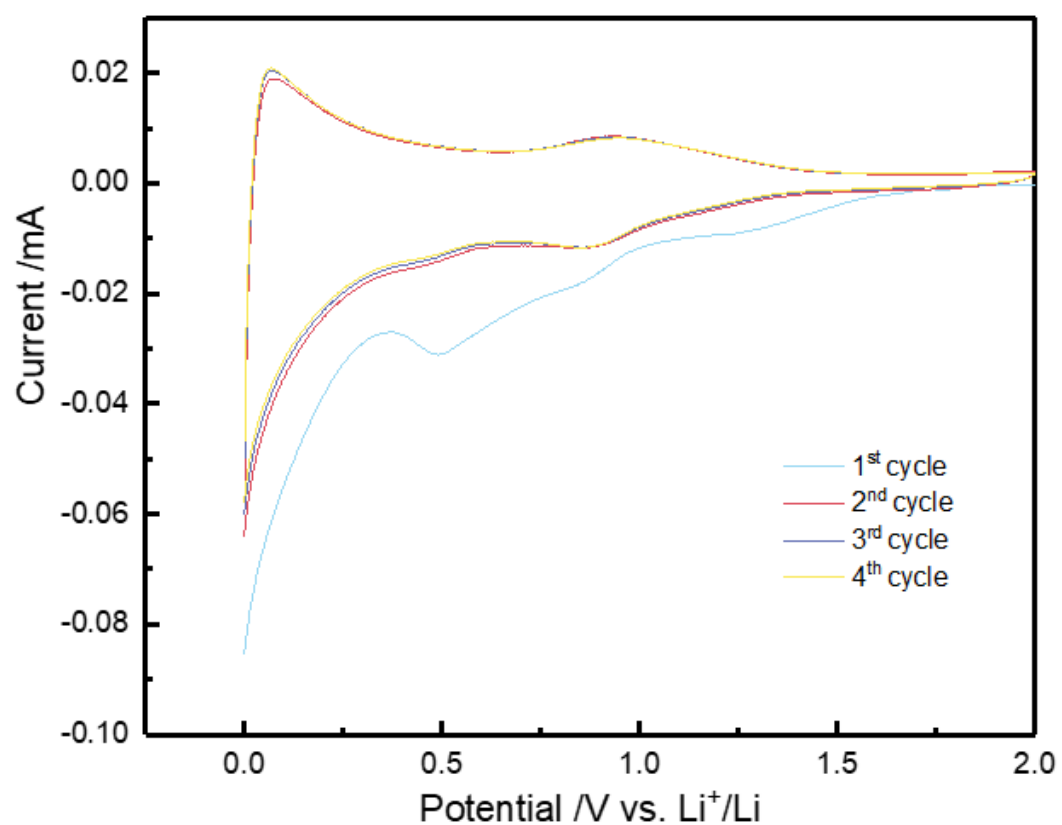

**Figure S10:** CV curve of the cathodic region (0.01 – 2 V vs.  $\text{Li}^+/\text{Li}$  potential range) performed at 65 ° using the NT10 membrane as the electrolyte and Super P carbon coated on copper as the working electrode.

**Table S3:** NLLS analysis on the Nyquist plots reported in Figure 7d in the manuscript collected by EIS on a Li/NT10/Li symmetrical cell upon aging. The NLLS fitting was performed through the RelaxIS3 software, and the corresponding resistance trend is shown in Figure 7e in the manuscript.

| Cell Condition  | Equivalent Circuit       | $R_i = R_1 + R_2 (\Omega)$ | $\chi^2$           |
|-----------------|--------------------------|----------------------------|--------------------|
| After 1 hour    | $R_e(R_1C_1)(R_2C_2)Q_w$ | 90                         | $3 \times 10^{-5}$ |
| After 3 hours   | $R_e(R_1C_1)(R_2C_2)Q_w$ | 95                         | $6 \times 10^{-6}$ |
| After 8 hours   | $R_e(R_1C_1)(R_2C_2)Q_w$ | 102                        | $5 \times 10^{-6}$ |
| After 20 hours  | $R_e(R_1C_1)(R_2C_2)Q_w$ | 108                        | $7 \times 10^{-6}$ |
| After 32 hours  | $R_e(R_1C_1)(R_2C_2)Q_w$ | 104                        | $7 \times 10^{-6}$ |
| After 2 days    | $R_e(R_1C_1)(R_2C_2)Q_w$ | 103                        | $7 \times 10^{-6}$ |
| After 2.5 days  | $R_e(R_1C_1)(R_2C_2)Q_w$ | 104                        | $7 \times 10^{-6}$ |
| After 3 days    | $R_e(R_1C_1)(R_2C_2)Q_w$ | 103                        | $2 \times 10^{-5}$ |
| After 3.5 days  | $R_e(R_1C_1)(R_2C_2)Q_w$ | 100                        | $2 \times 10^{-5}$ |
| After 4 days    | $R_e(R_1C_1)(R_2C_2)Q_w$ | 99                         | $8 \times 10^{-6}$ |
| After 4.5 days  | $R_e(R_1C_1)(R_2C_2)Q_w$ | 98                         | $6 \times 10^{-6}$ |
| After 5 days    | $R_e(R_1C_1)(R_2C_2)Q_w$ | 99                         | $9 \times 10^{-6}$ |
| After 5.5 days  | $R_e(R_1C_1)(R_2C_2)Q_w$ | 98                         | $1 \times 10^{-5}$ |
| After 6 days    | $R_e(R_1C_1)(R_2C_2)Q_w$ | 98                         | $1 \times 10^{-5}$ |
| After 6.5 days  | $R_e(R_1C_1)(R_2C_2)Q_w$ | 97                         | $1 \times 10^{-5}$ |
| After 7 days    | $R_e(R_1C_1)(R_2C_2)Q_w$ | 96                         | $1 \times 10^{-5}$ |
| After 7.5 days  | $R_e(R_1C_1)(R_2C_2)Q_w$ | 96                         | $1 \times 10^{-5}$ |
| After 8 days    | $R_e(R_1C_1)(R_2C_2)Q_w$ | 95                         | $9 \times 10^{-6}$ |
| After 8.5 days  | $R_e(R_1C_1)(R_2C_2)Q_w$ | 94                         | $1 \times 10^{-5}$ |
| After 9 days    | $R_e(R_1C_1)(R_2C_2)Q_w$ | 95                         | $1 \times 10^{-5}$ |
| After 9.5 days  | $R_e(R_1C_1)(R_2C_2)Q_w$ | 95                         | $9 \times 10^{-6}$ |
| After 10 days   | $R_e(R_1C_1)(R_2C_2)Q_w$ | 96                         | $9 \times 10^{-6}$ |
| After 10.5 days | $R_e(R_1C_1)(R_2C_2)Q_w$ | 97                         | $9 \times 10^{-6}$ |
| After 11 days   | $R_e(R_1C_1)(R_2C_2)Q_w$ | 98                         | $9 \times 10^{-6}$ |
| After 11.5 days | $R_e(R_1C_1)(R_2C_2)Q_w$ | 99                         | $8 \times 10^{-6}$ |
| After 12 days   | $R_e(R_1C_1)(R_2C_2)Q_w$ | 100                        | $9 \times 10^{-6}$ |
| After 12.5 days | $R_e(R_1C_1)(R_2C_2)Q_w$ | 101                        | $8 \times 10^{-6}$ |
| After 13 days   | $R_e(R_1C_1)(R_2C_2)Q_w$ | 103                        | $8 \times 10^{-6}$ |
| After 13.5 days | $R_e(R_1C_1)(R_2C_2)Q_w$ | 104                        | $8 \times 10^{-6}$ |
| After 14 days   | $R_e(R_1C_1)(R_2C_2)Q_w$ | 105                        | $8 \times 10^{-6}$ |
| After 14.5 days | $R_e(R_1C_1)(R_2C_2)Q_w$ | 107                        | $8 \times 10^{-6}$ |
| After 15 days   | $R_e(R_1C_1)(R_2C_2)Q_w$ | 110                        | $1 \times 10^{-5}$ |
| After 15.5 days | $R_e(R_1C_1)(R_2C_2)Q_w$ | 110                        | $7 \times 10^{-6}$ |
| After 16 days   | $R_e(R_1C_1)(R_2C_2)Q_w$ | 112                        | $7 \times 10^{-6}$ |
| After 16.5 days | $R_e(R_1C_1)(R_2C_2)Q_w$ | 114                        | $7 \times 10^{-6}$ |
| After 17 days   | $R_e(R_1C_1)(R_2C_2)Q_w$ | 115                        | $7 \times 10^{-6}$ |
| After 17.5 days | $R_e(R_1C_1)(R_2C_2)Q_w$ | 117                        | $7 \times 10^{-6}$ |
| After 18 days   | $R_e(R_1C_1)(R_2C_2)Q_w$ | 118                        | $7 \times 10^{-6}$ |
| After 18.5 days | $R_e(R_1C_1)(R_2C_2)Q_w$ | 120                        | $5 \times 10^{-6}$ |
| After 19 days   | $R_e(R_1C_1)(R_2C_2)Q_w$ | 122                        | $5 \times 10^{-6}$ |
| After 19.5 days | $R_e(R_1C_1)(R_2C_2)Q_w$ | 123                        | $5 \times 10^{-6}$ |

|                 |                          |     |                    |
|-----------------|--------------------------|-----|--------------------|
| After 20 days   | $R_e(R_1C_1)(R_2C_2)Q_w$ | 125 | $5 \times 10^{-6}$ |
| After 20.5 days | $R_e(R_1C_1)(R_2C_2)Q_w$ | 128 | $4 \times 10^{-6}$ |

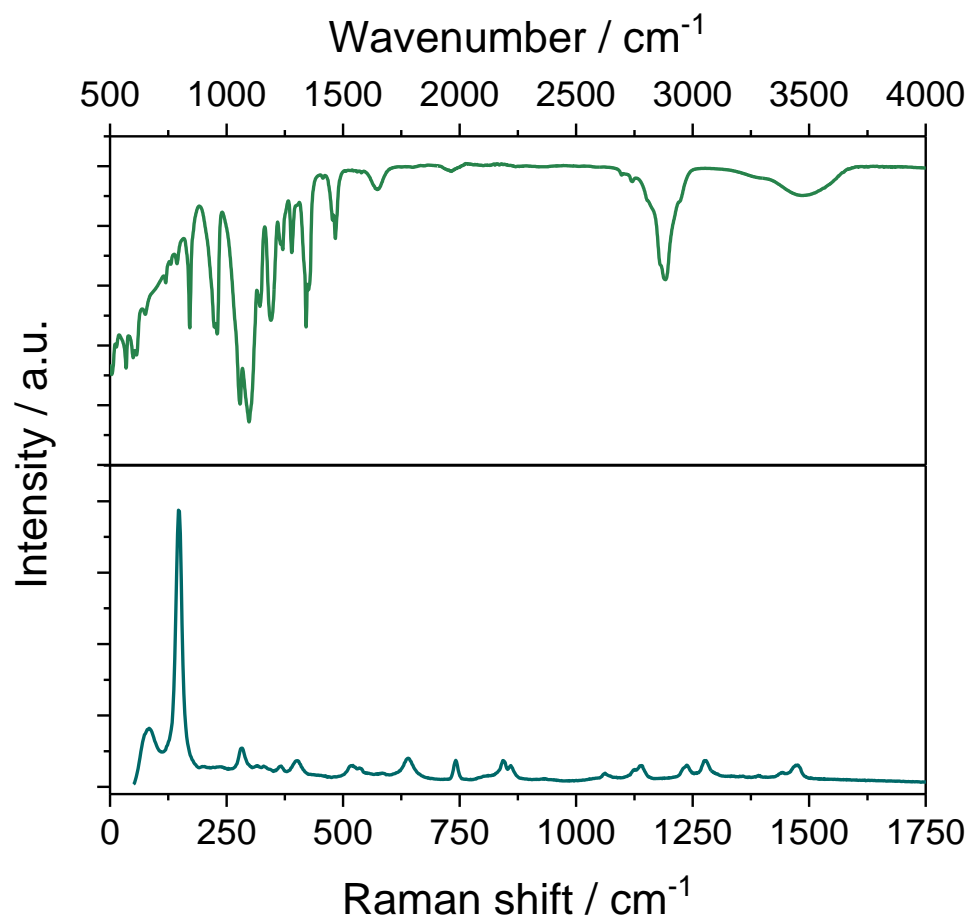

**Figure S11:** IR spectrum (top panel), recorded in the 500 – 4000 cm<sup>-1</sup> range, and Raman spectrum (bottom panel), recorded in the 0 – 1750 cm<sup>-1</sup> range, of the NT10.



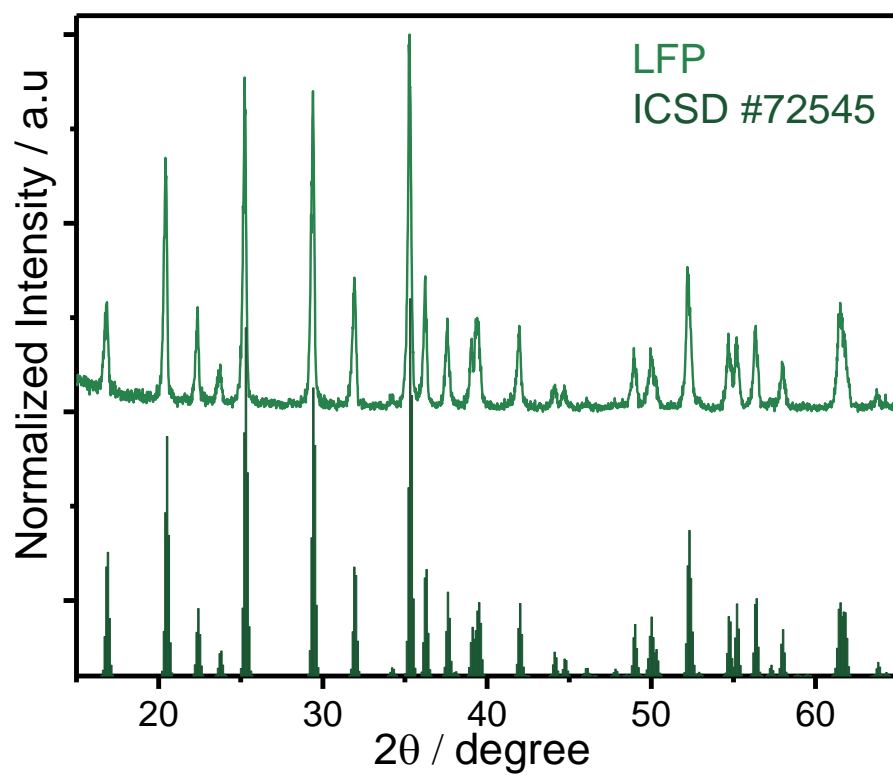

*Figure S12: XRD pattern of commercial LFP powder compared to corresponding reference diffractogram (ICSD #72545).*

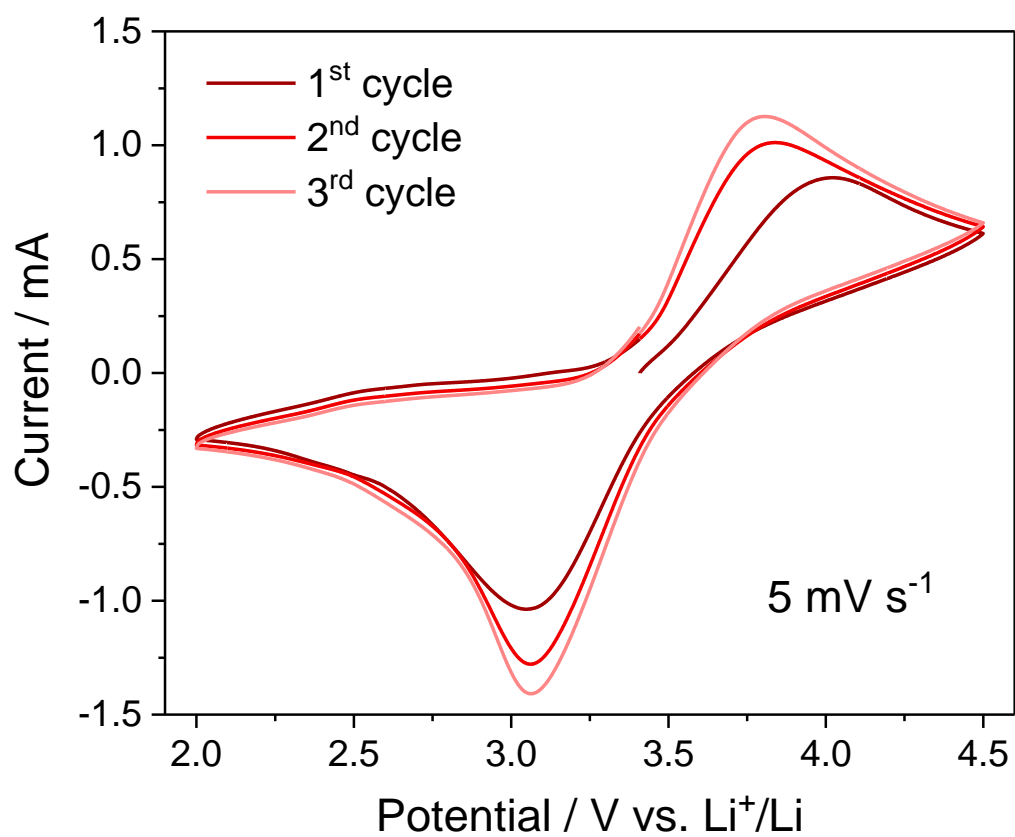

**Figure S13:** CV measurement performed on the Li/NT10/SS\_LFP cell in the potential range 2.5 – 4.5 V vs. Li<sup>+</sup>/Li at the scan rate of 5 mV s<sup>-1</sup>.
